# Supplementary material for: Hyaluronated and PEGylated Liposomes as a Potential Drug-Delivery Strategy to Specifically Target Liver Cancer and Inflammatory Cells
Source: MDPI journal article supplement (doi:10.3390/molecules27031062), 2022-02-04
Supplement: s1 [file s1]

Figure S1

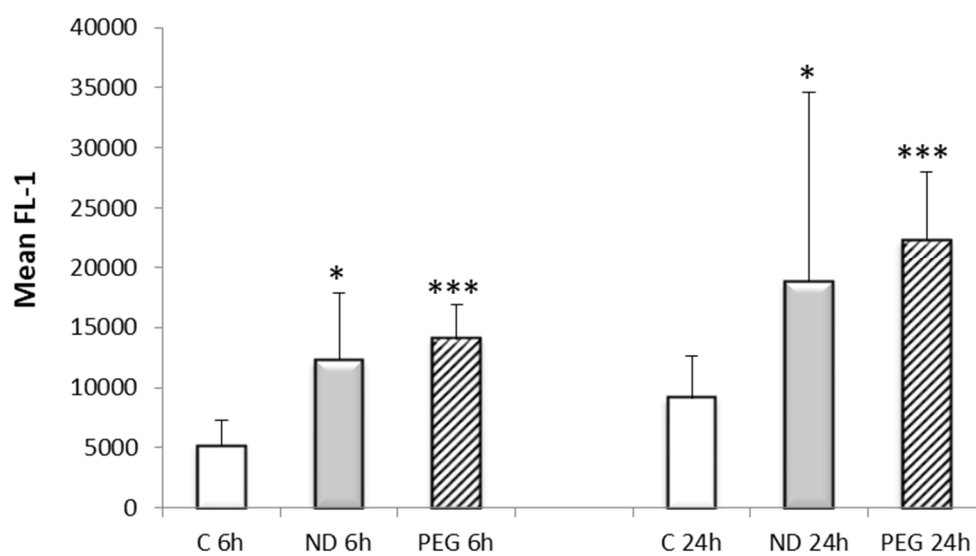

**Figure S1. Cellular uptake of PEG-coated FITC labelled liposomes in liver cancer cells.** Flow cytometry analysis of internalization of fluorescent liposomes in HepG2 and Huh7 after incubation of cells with synthesized PEG-coated liposomes at the indicated time points. Data in graphs are expressed as means  $\pm$  S.D of three independent experiments (\* $p < 0.05$ , \*\*\* $p < 0.001$  vs control; no significant differences was observed vs ND liposomes).
